# Supplementary material for: Assessment of Differentiated Thyroid Carcinomas in French Polynesia After Atmospheric Nuclear Tests Performed by France
Source: PubMed Central journal article supplement (PMC10163383; doi:10.1001/jamanetworkopen.2023.11908), 2023-05-05

## Supplemental Online Content

de Vathaire F, Zidane M, Xhaard C, et al. Assessment of differentiated thyroid carcinomas in French Polynesia after atmospheric nuclear tests performed by France. *JAMA Netw Open*. 2023;6(5):e2311908. doi:10.1001/jamanetworkopen.2023.11908

**eTable 1.** Description of Thyroid Cancer Cases by Phase of Study

**eTable 2.** Population Main Residence in French Polynesia at Time of Census of 1971

**eTable 3.** Mean Thyroid Radiation Dose Estimated for Controls by Age Group and Archipelago of Main Residence, 1971

**eTable 4.** Characteristics of Cases and Controls, by Phase of Study

**eTable 5.** Characteristics of Thyroid Radiation Dose From Atmospheric Nuclear Tests Among Individuals Born 1974 or Before Present in French Polynesia at Time of Tests

**eTable 6.** Characteristics of Thyroid Radiation Dose From Atmospheric Nuclear Tests Among Individuals Born 1974 or Before and Present in French Polynesia at Time of Tests by Phase of Study

**eTable 7.** Thyroid Cancer Risk by Radiation Dose Received to Thyroid Before Age 15 y and by Nuclear Site Work Status

**eTable 8.** Thyroid Cancer Risk by Lifetime Thyroid Radiation Dose and Nuclear Site Work Status

**eTable 9.** Papillary Differentiated Thyroid Carcinoma Risk by Radiation Dose Received to Thyroid Before Age 15 y and Nuclear Site Work Status

**eTable 10.** Papillary Differentiated Thyroid Carcinoma Risk by Lifetime Thyroid Radiation Dose and Nuclear Site Work Status

**eTable 11.** Radiation Dose Response Modifiers for Dose Received Before Age 15 y

**eFigure.** Study Flowchart

This supplemental material has been provided by the authors to give readers additional information about their work.

**eTable 1.** Description of Thyroid Cancer Cases by Phase of Study

|                                   | Phase 1 (n=229) | Phase 2 (n=166) |
|-----------------------------------|-----------------|-----------------|
| Women (%)                         | 88.6            | 81.1            |
| Age at time of first test (years) |                 |                 |
| Born after tests                  | 4.8             | 25.3            |
| Born during tests                 | 11.8            | 21.0            |
| 0-14                              | 52.0            | 40.4            |
| 15+                               | 31.4            | 13.3            |
| Age at diagnosis (years)          |                 |                 |
| 10-19                             | 3.5             | 3.0             |
| 20-29                             | 17.0            | 4.8             |
| 30-39                             | 33.2            | 14.4            |
| 40-49                             | 27.5            | 25.3            |
| 50-62                             | 18.8            | 52.4            |
| Histology : % papillary           | 76.9            | 83.7            |
| Tumour size (mm)                  |                 |                 |
| ≤ 10                              | 52.2            | 48.0            |
| 11-40                             | 36.9            | 41.3            |
| >40                               | 10.8            | 10.7            |
| Multifocal tumour (%)             | 39.0            | 35.7            |
| Bilateral tumour (%)              | 22.2            | 25.0            |
| Unifocal microcarcinoma (%)       | 35.8            | 33.1            |

**eTable 2.** Population Main Residence in French Polynesia at Time of Census of 1971

| Gender | Age group | Windward Islands | Leeward Islands | Marquisas Islands | Autrales Islands | Tuamotu-Gambier archipelago | Whole French Polynesia |
|--------|-----------|------------------|-----------------|-------------------|------------------|-----------------------------|------------------------|
| Men    | 0         | 7008             | 1466            | 594               | 474              | 657                         | 10199                  |
| Men    | 5         | 6111             | 1312            | 582               | 422              | 562                         | 8989                   |
| Men    | 10        | 5112             | 1201            | 482               | 381              | 411                         | 7587                   |
| Men    | 15        | 4834             | 927             | 337               | 315              | 362                         | 6775                   |
| Men    | 20        | 5029             | 469             | 124               | 137              | 572                         | 6331                   |
| Men    | 25        | 3415             | 409             | 142               | 130              | 380                         | 4476                   |
| Men    | 30        | 2960             | 433             | 143               | 122              | 364                         | 4022                   |
| Men    | 35        | 2824             | 395             | 138               | 137              | 298                         | 3792                   |
| Men    | 40        | 2266             | 361             | 111               | 101              | 264                         | 3103                   |
| Men    | 45        | 1763             | 277             | 72                | 102              | 212                         | 2426                   |
| Men    | 50        | 1182             | 230             | 72                | 80               | 176                         | 1740                   |
| Men    | 55        | 1052             | 274             | 47                | 64               | 145                         | 1582                   |
| Men    | 60        | 762              | 217             | 61                | 52               | 86                          | 1178                   |
| Men    | 65        | 555              | 146             | 33                | 40               | 67                          | 841                    |
| Men    | 70        | 294              | 79              | 14                | 31               | 36                          | 454                    |
| Men    | 75        | 153              | 38              | 13                | 12               | 17                          | 233                    |
| Men    | 80        | 69               | 17              | 5                 | 8                | 14                          | 113                    |
| Men    | 85        | 36               | 15              | 3                 | 2                | 2                           | 58                     |
| Women  | 0         | 6390             | 1412            | 555               | 491              | 595                         | 9443                   |
| Women  | 5         | 5956             | 1308            | 497               | 485              | 522                         | 8768                   |
| Women  | 10        | 4820             | 1233            | 454               | 374              | 411                         | 7292                   |
| Women  | 15        | 4411             | 969             | 366               | 302              | 334                         | 6382                   |
| Women  | 20        | 3072             | 432             | 159               | 133              | 209                         | 4005                   |
| Women  | 25        | 2940             | 406             | 139               | 130              | 200                         | 3815                   |
| Women  | 30        | 2685             | 398             | 133               | 131              | 180                         | 3527                   |
| Women  | 35        | 2452             | 350             | 130               | 115              | 154                         | 3201                   |
| Women  | 40        | 1903             | 318             | 90                | 107              | 132                         | 2550                   |
| Women  | 45        | 1543             | 310             | 71                | 82               | 139                         | 2145                   |
| Women  | 50        | 1026             | 227             | 49                | 62               | 115                         | 1479                   |
| Women  | 55        | 987              | 216             | 55                | 50               | 110                         | 1418                   |
| Women  | 60        | 722              | 189             | 36                | 39               | 74                          | 1060                   |
| Women  | 65        | 474              | 128             | 20                | 29               | 54                          | 705                    |
| Women  | 70        | 240              | 41              | 15                | 21               | 27                          | 344                    |
| Women  | 75        | 137              | 31              | 8                 | 10               | 16                          | 202                    |
| Women  | 80        | 71               | 12              | 2                 | 5                | 5                           | 95                     |
| Women  | 85        | 41               | 7               | 2                 | 2                | 1                           | 53                     |

**eTable 3.** Mean Thyroid Radiation Dose Estimated for Controls by Age Group and Archipelago of Main Residence, 1971

| Age group in 1971 | Windward Islands | Leeward Islands | Marquisas Islands | Autrales Islands | Tuamotu-Gambier archipelago |
|-------------------|------------------|-----------------|-------------------|------------------|-----------------------------|
| 0                 | 4.58             | 1.41            | 0.02              | 10.63            | 0.24                        |
| 5                 | 6.61             | 2.88            | 0.89              | 9.09             | 5.43                        |
| 10                | 5.85             | 2.44            | 1.3               | 8.24             | 4.17                        |
| 15                | 5.22             | 2.47            | 1.8               | 5.32             | 3.72                        |
| 20                | 4.54             | 0.68            | 2.02              | 3.41             | 3.58                        |
| 25                | 4.65             | 2.05            | 0.38              | 3.99             | 3.98                        |

**eTable 4.** Characteristics of Cases and Controls, by Phase of Study

| Characteristic                               | Phase 1          |                     |                | Phase 2          |                     |                | P-value <sup>a</sup><br>(initial vs extension) |
|----------------------------------------------|------------------|---------------------|----------------|------------------|---------------------|----------------|------------------------------------------------|
|                                              | Cases<br>(n=229) | Controls<br>(n=373) | P-value        | Cases<br>(n=166) | Controls<br>(n=182) | P-value        |                                                |
| Women (%)                                    | 88.6             | 87.4                | - <sup>b</sup> | 80.2             | 80.8                | - <sup>b</sup> | 0.002                                          |
| Age at end of follow-up (years) : mean (std) | 38.5 (10.4)      | 38.3 (10.2)         | - <sup>b</sup> | 50.0 (13.2)      | 50.2 (13.1)         | - <sup>b</sup> | <0.0001                                        |
| Parents Ethnical origin (%)                  |                  |                     |                |                  |                     |                |                                                |
| Both Polynesian                              | 53.5             | 51.0                |                | 58.4             | 42.3                |                |                                                |
| Polynesian- Asian                            | 14.0             | 11.3                | 0.2            | 15.0             | 18.7                | 0.05           | 0.06                                           |
| Polynesian-European                          | 20.2             | 19.3                |                | 15.0             | 17.0                |                |                                                |
| Polynesian-Asian-European / Other            | 12.3             | 14.2                |                | 11.2             | 22.0                |                |                                                |
| Familial history of thyroid cancer (%)       | 5.2              | 1.9                 | 0.03           | 4.8              | 1.1                 | 0.08           | 0.4                                            |
| Familial history of thyroid pathology (%)    | 40.6             | 15.8                | <0.0001        | 37.4             | 20.3                | 0.0004         | 0.09                                           |
| Personal history of radiation therapy (%)    | 3.5              | 0.5                 | <0.01          | 15.7             | 1.7                 | 0.0006         | <0.0001                                        |
| Location of birth (%)                        |                  |                     |                |                  |                     |                |                                                |
| Tahiti & Moorea                              | 55.5             | 57.4                |                | 63.3             | 57.8                |                |                                                |

|                                   |      |      |         |      |      |        |         |
|-----------------------------------|------|------|---------|------|------|--------|---------|
| Other Société islands             | 20.5 | 18.2 | 0.9     | 19.9 | 18.9 | 0.5    | 0.1     |
| Australes                         | 6.1  | 4.8  |         | 6.6  | 6.7  |        |         |
| Marquises                         | 6.1  | 5.9  |         | 2.4  | 2.8  |        |         |
| Tuamotu-Gambier                   | 11.8 | 13.7 |         | 13.5 | 8.3  |        |         |
| Mean height (m)                   |      |      |         |      |      |        |         |
| Women                             | 1.64 | 1.63 | 0.002   | 1.66 | 1.65 | 0.3    | <0.001  |
| Men                               | 1.75 | 1.73 |         | 1.76 | 1.75 |        |         |
| Mean weight at end follow-up (kg) |      |      |         |      |      |        |         |
| Women                             | 82   | 73   | <0.0001 | 86   | 78   | 0.0004 | <0.0001 |
| Men                               | 98   | 89   |         | 106  | 93   |        |         |
| Mean BMI at end follow-up         |      |      |         |      |      |        |         |
| Women                             | 30.1 | 27.5 | <0.0001 | 31.5 | 28.9 | 0.001  | 0.0004  |
| Men                               | 31.9 | 29.8 |         | 34.4 | 30.2 |        |         |
| Diploma (%)                       |      |      |         |      |      |        |         |
| No                                | 44.1 | 37.0 | 0.06    | 36.6 | 32.4 | 0.4    | <0.0001 |
| Yes                               | 55.9 | 63.0 |         | 63.9 | 67.6 |        |         |

Number of pregnancies (%)

|      |      |      |      |      |      |      |         |
|------|------|------|------|------|------|------|---------|
| 0    | 12.3 | 15.0 |      | 12.2 | 12.2 |      |         |
| 1-4  | 44.8 | 51.5 | 0.01 | 53.4 | 65.3 | 0.02 | <0.0001 |
| 5-16 | 42.9 | 33.4 |      | 35.4 | 22.5 |      |         |

---

<sup>a</sup> Overall comparison between initial and extension study, stratified on the status (case/control)

<sup>b</sup> Matching criteria

**eTable 5.** Characteristics of Thyroid Radiation Dose From Atmospheric Nuclear Tests Among Individuals Born 1974 or Before Present in French Polynesia at Time of Tests

| Dose in mGy mean, median (min-max) | Thyroid cancer cases<br>(n=337) | Controls<br>(n=441)      |
|------------------------------------|---------------------------------|--------------------------|
| <b><i>Lifetime dose</i></b>        |                                 |                          |
| Whole sample                       | 4.71; 3.47 (<0.01-36.25)        | 4.60; 3.65 (<0.01-31.19) |
| <b>Gender</b>                      |                                 |                          |
| Male                               | 4.32; 3.28 (<0.01-17.89)        | 4.29; 3.27 (<0.01-22.15) |
| Female                             | 4.77; 3.54 (<0.01-36.25)        | 4.65; 3.66 (<0.01-31.19) |
| <b>Source</b>                      |                                 |                          |
| Leafy vegetables                   | 3.28; 2.59 (<0.01-23.01)        | 3.30; 2.55 (<0.01-29.63) |
| Fresh cow's milk*                  | 0.58; 0.02 (<0.01-17.65)        | 0.56; 0.09 (<0.01-8.92)  |
| Inhalation                         | 0.22; 0.16 (<0.01-4.64)         | 0.19; 0.16 (<0.01-1.63)  |
| Cistern drinking water             | 0.16; <0.01 (<0.01-6.52)        | 0.11; <0.01 (<0.01-5.64) |
| Other foodstuffs                   | 0.04; 0.02 (<0.01-0.35)         | 0.05; 0.02 (<0.01-0.94)  |
| External irradiation               | 0.43; 0.43 (<0.01-5.81)         | 0.39; 0.44 (<0.01-3.5)   |
| <b>Year of exposure</b>            |                                 |                          |
| 1966                               | 0.8; 0.33 (0.02-29.82)          | 0.48; 0.33 (0.01-9.03)   |
| 1967                               | 0.99; 0.7 (0.04-5.31)           | 0.99; 0.71 (0.02-7.2)    |
| 1968                               | 0.29; 0.22 (<0.01-1.73)         | 0.29; 0.22 (0.01-1.38)   |
| 1969                               | 0.01; 0.01 (<0.01-0.06)         | 0.01; 0.01 (<0.01-0.08)  |
| 1970                               | 0.15; 0.11 (0.01-0.97)          | 0.15; 0.12 (0.01-0.82)   |
| 1971                               | 0.38; 0.26 (<0.01-4.17)         | 0.36; 0.26 (<0.01-2.67)  |
| 1972                               | 0.06; 0.05 (<0.01-0.41)         | 0.06; 0.04 (<0.01-0.36)  |



|                                                 |                           |                          |
|-------------------------------------------------|---------------------------|--------------------------|
| 1973                                            | 0.32; 0.07 (<0.01-22.6)   | 0.33; 0.07 (<0.01-14.83) |
| 1974                                            | 2.28; 1.89 (<0.01-20.19)  | 2.44; 1.9 (<0.01-21.52)  |
| Location of residence at time of birth          |                           |                          |
| Tahiti & Moorea                                 | 4.90; 4.06 (<0.01-24.29)  | 5.12; 4.14 (0-25.12)     |
| Other Société islands                           | 3.63; 3.03 (0.21-17.89)   | 3.54; 2.74 (0.18-31.19)  |
| Marquises                                       | 3.43; 1.03 (0.02-32.1)    | 1.99; 1.14 (0.03-7)      |
| Australes                                       | 6.85; 5.41 (0.67-22.79)   | 7.37; 5.15 (1.78-18.29)  |
| Tuamotu-Gambier                                 | 5.65; 3.46 (0.02-36.25)   | 3.78; 3.5 (<0.01-14.64)  |
| <hr/> <i>Dose received before the age of 15</i> |                           |                          |
| Whole sample                                    | 2.93; 1.30 (<0.01-36.15)  | 2.71; 1.50 (<0.01-31.19) |
| Gender                                          |                           |                          |
| Male                                            | 2.61; 1.16 (<0.01-17.89)  | 2.15; 1.03 (<0.01-11.87) |
| Female                                          | 2.99; 1.32 (<0.01-36.15)  | 2.81; 1.56 (<0.01-31.19) |
| Source                                          |                           |                          |
| Leafy vegetables                                | 1.95; 0.92 (<0.01-23.01)  | 1.84; 0.87 (<0.01-29.63) |
| Fresh cow's milk*                               | 0.43; <0.01 (<0.01-17.65) | 0.42; 0 (<0.01-8.92)     |
| Inhalation                                      | 0.16; 0.06 (<0.01-4.64)   | 0.13; 0.07 (<0.01-0.75)  |
| Cistern drinking water                          | 0.13; <0.01 (<0.01-6.52)  | 0.09; <0.01 (<0.01-5.64) |
| Other foodstuffs                                | 0.02; <0.01 (<0.01-0.24)  | 0.02; <0.01 (<0.01-0.29) |
| External irradiation                            | 0.25; 0.09 (<0.01-5.8)    | 0.22; 0.10 (<0.01-2.25)  |
| Year of exposure                                |                           |                          |
| 1966                                            | 0.63; 0.24 (<0.01-29.82)  | 0.35; 0.25 (<0.01-3.21)  |
| 1967                                            | 0.71; 0.47 (<0.01-5.31)   | 0.72; 0.44 (<0.01-7.2)   |
| 1968                                            | 0.21; 0.13 (0-1.73)       | 0.20; 0.12 (<0.01-1.38)  |

|      |                           |                           |
|------|---------------------------|---------------------------|
| 1969 | 0.01; <0.01 (<0.01-0.06)  | <0.01; <0.01 (<0.01-0.04) |
| 1970 | 0.1; 0.06 (<0.01-0.97)    | 0.09; 0.05 (<0.01-0.82)   |
| 1971 | 0.24; 0.05 (0-40.17)      | 0.22; 0.06 (<0.01-2.67)   |
| 1972 | 0.03; <0.01 (<0.01-0.41)  | 0.03; <0.01 (<0.01-0.36)  |
| 1973 | 0.27; <0.01 (<0.01-22.6)  | 0.22; <0.01 (<0.01-14.83) |
| 1974 | 1.16; <0.01 (<0.01-20.19) | 1.24; <0.01 (<0.01-21.52) |

Location of residence at time of birth

|                       |                          |                          |
|-----------------------|--------------------------|--------------------------|
| Tahiti & Moorea       | 3.18; 1.86 (<0.01-24.29) | 3.15; 1.98 (<0.01-25.12) |
| Other Société islands | 1.87; 1.17 (<0.01-17.89) | 1.99; 0.86 (<0.01-31.19) |
| Marquises             | 2.10; 0.34 (<0.01-32.1)  | 0.72; 0.33 (<0.01-3.77)  |
| Australes             | 3.63; 0.68 (<0.01-22.79) | 3.44; 1.03 (<0.01-18.29) |
| Tuamotu-Gambier       | 3.99; 1.18 (<0.01-36.15) | 2.35 0.91 (<0.01-14.64)  |

---

**eTable 6.** Characteristics of Thyroid Radiation Dose From Atmospheric Nuclear Tests Among Individuals Born 1974 or Before and Present in French Polynesia at Time of Tests by Phase of Study

| Dose in mGy mean, median (min-max) | Phase 1                         |                          | Phase 2                         |                          |
|------------------------------------|---------------------------------|--------------------------|---------------------------------|--------------------------|
|                                    | Thyroid cancer cases<br>(n=229) | Controls<br>(n=373)      | Thyroid cancer cases<br>(n=166) | Controls<br>(n=182)      |
| <i>Lifetime dose</i>               |                                 |                          |                                 |                          |
| Whole sample                       | 4.77; 3.84 (<0.01-32.1)         | 5.03; 4.02 (<0.01-25.12) | 4.59; 3.04 (0.02-36.25)         | 3.36; 2.17 (<0.01-31.19) |
| Gender                             |                                 |                          |                                 |                          |
| Male                               | 4.27; 3.33 (<0.01-15.71)        | 5.26; 4.82 (0.01-22.15)  | 4.37; 3.15 (0.23-17.89)         | 2.56; 1.56 (<0.01-8.25)  |
| Female                             | 4.83; 3.88 (<0.01-32.1)         | 5.00; 3.99 (<0.01-25.12) | 4.65; 3.02 (0.02-36.25)         | 3.56; 2.31 (0.03-31.19)  |
| Source                             |                                 |                          |                                 |                          |
| Leafy vegetables                   | 3.49; 2.61 (<0.01-23.01)        | 3.76; 2.67 (<0.01-21.54) | 2.88; 1.91 (<0.01-20.35)        | 1.98; 0.87 (<0.01-29.63) |
| Fresh cow's milk <sup>a</sup>      | 0.48; 0.01 (<0.01-17.65)        | 0.51; 0.04 (<0.01-8.92)  | 0.77; 0.02 (<0.01-12.19)        | 0.7; 0.15 (<0.01-5.92)   |
| Inhalation                         | 0.2; 0.15 (<0.01-4.64)          | 0.18; 0.16 (<0.01-1.63)  | 0.26; 0.16 (0.01-3.57)          | 0.21; 0.17 (<0.01-0.75)  |
| Cistern drinking water             | 0.13; <0.01 (<0.01-6.02)        | 0.11; 0 (<0.01-4.56)     | 0.21; <0.01 (<0.01-6.52)        | 0.1; <0.01 (<0.01-5.64)  |
| Other foodstuffs                   | 0.05; 0.03 (<0.01-0.35)         | 0.06; 0.03 (<0.01-0.94)  | 0.03; 0.01 (<0.01-0.34)         | 0.02; 0.01 (<0.01-0.14)  |

|                                           |                          |                          |                          |                          |
|-------------------------------------------|--------------------------|--------------------------|--------------------------|--------------------------|
| External irradiation                      | 0.42; 0.44 (<0.01-4.59)  | 0.4; 0.44 (<0.01-3.5)    | 0.44; 0.3 (0.01-5.81)    | 0.35; 0.32 (<0.01-1.47)  |
| Year of exposure                          |                          |                          |                          |                          |
| 1966                                      | 0.58; 0.32 (0.05-13.59)  | 0.53; 0.36 (0.05-9.03)   | 1.29; 0.34 (0.02-29.82)  | 0.30; 0.20 (0.01-1.20)   |
| 1967                                      | 0.96; 0.69 (0.10-5.31)   | 1.06; 0.76 (0.05-6.79)   | 1.07; 0.82 (0.04-4.45)   | 0.74; 0.39 (0.02-7.20)   |
| 1968                                      | 0.30; 0.23 (0.03-1.73)   | 0.32; 0.23 (0.03-1.38)   | 0.27; 0.19 (<0.01-1.28)  | 0.17; 0.11 (0.01-1.30)   |
| 1969                                      | 0.01; 0.01 (<0.01-0.06)  | 0.01; 0.01 (<0.01-0.08)  | 0.01; 0.01 (<0.01-0.04)  | 0.01; 0.01 (<0.01-0.02)  |
| 1970                                      | 0.15; 0.11 (0.01-0.97)   | 0.16; 0.13 (0.02-0.68)   | 0.14; 0.11 (0.01-0.68)   | 0.11; 0.07 (0.01-0.82)   |
| 1971                                      | 0.38; 0.27 (0.01-3.61)   | 0.4; 0.28 (0.01-2.04)    | 0.38; 0.24 (<0.01-4.17)  | 0.26; 0.16 (<0.01-2.67)  |
| 1972                                      | 0.06; 0.05 (<0.01-0.38)  | 0.06; 0.05 (<0.01-0.3)   | 0.05; 0.04 (<0.01-0.41)  | 0.04; 0.03 (<0.01-0.36)  |
| 1973                                      | 0.41; 0.07 (<0.01-22.6)  | 0.36; 0.07 (<0.01-14.83) | 0.16; 0.06 (<0.01-6.29)  | 0.26; 0.05 (<0.01-13.77) |
| 1974                                      | 2.38; 2.00 (<0.01-20.19) | 2.61; 2.07 (<0.01-18.05) | 2.10; 1.20 (<0.01-14.78) | 1.95; 1.22 (<0.01-21.52) |
| Archipelago of residence at time of birth |                          |                          |                          |                          |
| Tahiti & Moorea                           | 4.97; 4.25 (<0.01-24.29) | 5.68; 4.47 (<0.01-25.12) | 4.76; 3.65 (0.02-14.95)  | 3.62; 2.46 (<0.01-9.71)  |
| Other Société islands                     | 3.79; 3.17 (0.67-15.71)  | 3.69; 3.22 (0.99-20.31)  | 3.38; 2.33 (0.21-17.89)  | 3.2; 1.22 (0.18-31.19)   |
| Marquises                                 | 4.20; 1.23 (0.02-32.1)   | 2.47; 2.15 (0.38-7)      | 2.22; 1.03 (0.19-7.45)   | 0.55; 0.41 (0.03-1.23)   |
| Australes                                 | 7.66; 5.56 (1.26-22.79)  | 7.54; 5.15 (2.67-18.29)  | 4.01; 3.39 (0.67-8.6)    | 6.42; 5.07 (1.78-13.79)  |

|                                             |                           |                          |                           |                          |
|---------------------------------------------|---------------------------|--------------------------|---------------------------|--------------------------|
| Tuamotu-Gambier                             | 4.36; 3.44 (0.02-18.26)   | 4.07; 3.67 (<0.01-14.64) | 7.95; 3.65 (0.23-36.25)   | 2.35; 1.2 (0.36-7.86)    |
| <b><i>Dose received before 15 years</i></b> |                           |                          |                           |                          |
| Whole sample                                | 2.69; 1.2 (<0.01-32.1)    | 2.7; 1.51 (<0.01-25.12)  | 3.38; 1.42 (<0.01-36.15)  | 2.74; 1.45 (<0.01-31.19) |
| <b>Gender</b>                               |                           |                          |                           |                          |
| Male                                        | 1.87; 1.15 (<0.01-8.22)   | 2.29; 1.15 (<0.01-11.87) | 3.35; 1.42 (<0.01-17.89)  | 1.89; 0.91 (<0.01-8.25)  |
| Female                                      | 2.8; 1.28 (<0.01-32.1)    | 2.76; 1.59 (<0.01-25.12) | 3.38; 1.43 (<0.01-36.15)  | 2.96; 1.5 (<0.01-31.19)  |
| <b>Source</b>                               |                           |                          |                           |                          |
| Leafy vegetables                            | 1.91; 0.92 (<0.01-23.01)  | 1.91; 0.99 (<0.01-21.54) | 2.01; 1.02 (<0.01-20.28)  | 1.63; 0.52 (<0.01-29.63) |
| Fresh cow's milk <sup>a</sup>               | 0.30; <0.01 (<0.01-17.65) | 0.36; 0 (<0.01-8.92)     | 0.67; <0.01 (<0.01-12.19) | 0.57; 0.01 (<0.01-5.92)  |
| Inhalation                                  | 0.13; 0.05 (<0.01-4.64)   | 0.11; 0.06 (<0.01-0.72)  | 0.20; 0.09 (<0.01-3.56)   | 0.17; 0.10 (<0.01-0.75)  |
| Cistern drinking water                      | 0.11; <0.01 (<0.01-6.02)  | 0.09; <0.01 (<0.01-4.56) | 0.17; <0.01 (<0.01-6.52)  | 0.10; <0.01 (<0.01-5.64) |
| Other foodstuffs                            | 0.01; <0.01 (<0.01-0.24)  | 0.02; <0.01 (<0.01-0.29) | 0.02; <0.01 (<0.01-0.14)  | 0.01; <0.01 (<0.01-0.12) |
| External irradiation                        | 0.22; 0.09 (<0.01-4.04)   | 0.21; 0.09 (<0.01-2.25)  | 0.31; 0.12 (<0.01-5.8)    | 0.26; 0.14 (<0.01-1.47)  |
| <b>Year of exposure</b>                     |                           |                          |                           |                          |
| 1966                                        | 0.46; 0.25 (<0.01-13.59)  | 0.37; 0.28 (<0.01-3.21)  | 1; 0.23 (<0.01-29.82)     | 0.26; 0.18 (<0.01-1.2)   |
| 1967                                        | 0.64; 0.40 (<0.01-5.31)   | 0.73; 0.49 (<0.01-6.79)  | 0.85; 0.52 (<0.01-3.85)   | 0.66; 0.29 (<0.01-7.2)   |

|      |                           |                           |                          |                           |
|------|---------------------------|---------------------------|--------------------------|---------------------------|
| 1968 | 0.2; 0.12 (<0.01-1.73)    | 0.21; 0.15 (<0.01-1.38)   | 0.22; 0.13 (<0.01-1.08)  | 0.15; 0.08 (<0.01-1.3)    |
| 1969 | <0.01; <0.01 (<0.01-0.06) | <0.01; <0.01 (<0.01-0.04) | 0.01; <0.01 (<0.01-0.02) | <0.01; <0.01 (<0.01-0.01) |
| 1970 | 0.09; 0.03 (<0.01-0.97)   | 0.1; 0.05 (<0.01-0.68)    | 0.11; 0.07 (<0.01-0.68)  | 0.09; 0.05 (<0.01-0.82)   |
| 1971 | 0.22; <0.01 (<0.01-3.61)  | 0.22; 0.04 (<0.01-2.04)   | 0.28; 0.10 (<0.01-4.17)  | 0.21; 0.09 (<0.01-2.67)   |
| 1972 | 0.03; <0.01 (<0.01-0.38)  | 0.03; <0.01 (<0.01-0.3)   | 0.04; 0.02 (<0.01-0.41)  | 0.03; 0.02 (<0.01-0.36)   |
| 1973 | 0.35; <0.01 (<0.01-22.6)  | 0.21; <0.01 (<0.01-14.83) | 0.13; 0.02 (<0.01-6.29)  | 0.24; 0.02 (<0.01-13.77)  |
| 1974 | 1.01; <0.01 (<0.01-20.19) | 1.15; <0.01 (<0.01-18.05) | 1.44; 0.05 (<0.01-14.78) | 1.52; 0.17 (<0.01-21.52)  |

Archipelago of residence at time of birth

|                       |                          |                          |                          |                          |
|-----------------------|--------------------------|--------------------------|--------------------------|--------------------------|
| Tahiti & Moorea       | 2.83; 1.74 (<0.01-24.29) | 3.25; 2.12 (<0.01-25.12) | 3.86; 2.85 (<0.01-14.95) | 2.9; 1.87 (<0.01-9.71)   |
| Other Société islands | 1.6; 1.17 (<0.01-8.39)   | 1.74; 0.99 (<0.01-20.31) | 2.28; 1.18 (<0.01-17.89) | 2.58; 0.71 (<0.01-31.19) |
| Marquises             | 2.64; 0.35 (<0.01-32.1)  | 0.78; 0.31 (<0.01-3.77)  | 1.24; 0.26 (<0.01-6.69)  | 0.53; 0.34 (0.03-1.23)   |
| Australes             | 4.29; 0.92 (<0.01-22.79) | 2.89; 0.33 (<0.01-18.29) | 1.35; 0.03 (<0.01-5.34)  | 6.42; 5.07 (1.78-13.79)  |
| Tuamotu-Gambier       | 3.19; 1.3 (<0.01-18.26)  | 2.44; 1.33 (<0.01-14.64) | 5.43; 0.66 (<0.01-36.15) | 1.89; 0.77 (<0.01-7.85)  |

---

<sup>a</sup>Only in Tahiti.

**eTable 7.** Thyroid Cancer Risk by Radiation Dose Received to Thyroid Before Age 15 y and by Nuclear Site Work Status

| Exposure          | Total population, matched analysis<br>(395 cases and 555 controls) |                         |             | Excluding unifocal micro carcinomas<br>size and their controls, matched<br>analysis<br>(258 cases / 359 controls) |                         |             | Excluding unifocal micro carcinomas,<br>unmatched analysis, stratified on study, sex<br>and age<br>(258 cases / 555 controls) |                         |         |
|-------------------|--------------------------------------------------------------------|-------------------------|-------------|-------------------------------------------------------------------------------------------------------------------|-------------------------|-------------|-------------------------------------------------------------------------------------------------------------------------------|-------------------------|---------|
|                   | Cases/<br>Controls                                                 | OR (95%CI) <sup>a</sup> | p-<br>value | Cases/<br>Controls                                                                                                | OR (95%CI) <sup>a</sup> | p-<br>value | Cases/<br>Controls                                                                                                            | OR (95%CI) <sup>a</sup> | p-value |
|                   | Thyroid dose before age 15                                         |                         |             |                                                                                                                   |                         |             |                                                                                                                               |                         |         |
| <1 mGy            | 203/272                                                            | 1 <sup>b</sup>          |             | 133/180                                                                                                           | 1 <sup>b</sup>          |             | 203/272                                                                                                                       | 1 <sup>b</sup>          |         |
| 1–9.9 mGy         | 173/266                                                            | 0.9 (0.5; 1.5)          |             | 107/170                                                                                                           | 0.9 (0.4; 2.0)          |             | 107/266                                                                                                                       | 1.0 (0.6; 1.7)          |         |
| 10 – 19.9 mGy     | 15/13                                                              | 1.2 (0.4; 3.5)          |             | 14/7                                                                                                              | 2.5 (0.6; 10.2)         |             | 14/13                                                                                                                         | 2.3 (0.8; 6.4)          |         |
| 20 – 35 mGy       | 4/4                                                                | 1.9 (0.3; 14.1)         |             | 4/2                                                                                                               | 3.9 (0.3; 54.2)         |             | 4/4                                                                                                                           | 3.3 (0.7; 16.9)         |         |
| Linear model      |                                                                    | 0.040 (-0.086; 0.17)    | 0.3         |                                                                                                                   | 0.11 (-0.15; 0.36)      | 0.095       |                                                                                                                               | 0.085 (-0.033; 0.20)    | 0.02    |
| Exponential model |                                                                    | 0.078 (-0.015; 0.017)   | 0.19        |                                                                                                                   | 0.15 (0.047; 0.26)      | 0.02        |                                                                                                                               | 0.083 (0.025; 0.14)     | 0.02    |
| Quadratic model   |                                                                    | 0.0050 (-0.0060; 0.016) | 0.13        |                                                                                                                   | 0.015 (-0.012; 0.041)   | 0.02        |                                                                                                                               | 0.0070 (-0.0020; 0.021) | 0.01    |

Work at nuclear sites during tests

|     |         |                |     |         |                |     |         |                |     |
|-----|---------|----------------|-----|---------|----------------|-----|---------|----------------|-----|
| No  | 375/541 | 1 <sup>b</sup> |     | 248/351 | 1 <sup>b</sup> |     | 248/541 | 1 <sup>b</sup> |     |
| Yes | 13/14   | 1.4 (0.5; 4.1) | 0.5 | 10/8    | 1.5 (0.5; 5.1) | 0.5 | 10/14   | 2.0 (0.6; 6.3) | 0.2 |

<sup>a</sup>OR: odds ratio, CI: confidence interval. Adjusted for ethnic group, level of education, obesity, family history of thyroid cancer, personal history of radiotherapy, dietary iodine intake, and number of pregnancies for women.

<sup>b</sup>Reference category



**eTable 8.** Thyroid Cancer Risk by Lifetime Thyroid Radiation Dose and Nuclear Site Work Status

| Exposure          | Total population, matched analysis<br>(395 cases and 555 controls) |                         |             | Excluding unifocal micro carcinomas<br>size and their controls, matched<br>analysis<br>(258 cases / 359 controls) |                         |             | Excluding unifocal micro carcinomas,<br>unmatched analysis, stratified on study, sex<br>and age<br>(258 cases / 555 controls) |                         |         |
|-------------------|--------------------------------------------------------------------|-------------------------|-------------|-------------------------------------------------------------------------------------------------------------------|-------------------------|-------------|-------------------------------------------------------------------------------------------------------------------------------|-------------------------|---------|
|                   | Cases/<br>Controls                                                 | OR (95%CI) <sup>a</sup> | p-<br>value | Cases/<br>Controls                                                                                                | OR (95%CI) <sup>a</sup> | p-<br>value | Cases/<br>Controls                                                                                                            | OR (95%CI) <sup>a</sup> | p-value |
|                   | Lifetime thyroid dose                                              |                         |             |                                                                                                                   |                         |             |                                                                                                                               |                         |         |
| <1 mGy            | 106/132                                                            | 1 <sup>b</sup>          |             | 78/96                                                                                                             | 1 <sup>b</sup>          |             | 78/132                                                                                                                        | 1 <sup>b</sup>          |         |
| 1– 9.9 mGy        | 259/385                                                            | 1.0 (0.54; 1.68)        | 0.2         | 156/243                                                                                                           | 0.83 (0.42; 1.64)       | 0.3         | 156/385                                                                                                                       | 1.05 (0.64; 1.73)       | 0.2     |
| 10 – 19.9 mGy     | 25/33                                                              | 1.3 (0.59; 2.85)        |             | 20/17                                                                                                             | 1.75 (0.64; 4.78)       |             | 20/33                                                                                                                         | 1.83 (0.82; 4.08)       |         |
| 20 – 39 mGy       | 5/4                                                                | 1.6 (0.28; 9.57)        |             | 4/3                                                                                                               | 1.96 (0.23; 16.5)       |             | 4/4                                                                                                                           | 2.69 (0.57; 12.6)       |         |
| Linear model      |                                                                    | 0.051 (-0.058; 0.16)    | 0.2         |                                                                                                                   | 0.10 (-0.098; 0.30)     | 0.07        |                                                                                                                               | 0.058 (-0.029; 0.14)    | 0.05    |
| Exponential model |                                                                    | 0.065 (-0.013; 0.14)    | 0.2         |                                                                                                                   | 0.12 (0.038; 0.21)      | 0.02        |                                                                                                                               | 0.068 (0.0013; 0.012)   | 0.04    |

|                                    |         |                   |     |         |                   |      |         |                   |      |
|------------------------------------|---------|-------------------|-----|---------|-------------------|------|---------|-------------------|------|
| Quadratic model                    |         | 0.0033            | 0.2 |         | 0.011             | 0.02 |         | 0.0038 (-0.0015;  | 0.04 |
|                                    |         | (-0.0035; 0.010)  |     |         | (-0,0063; 0.027)  |      |         | 0.0092)           |      |
| Work at nuclear sites during tests |         |                   |     |         |                   |      |         |                   |      |
| No                                 | 375/541 | 1 <sup>b</sup>    |     | 248/351 | 1 <sup>b</sup>    |      | 248/541 | 1 <sup>b</sup>    |      |
| Yes                                | 13/14   | 1.45 (0.49; 4.25) | 0.5 | 10/8    | 1.63 (0.47; 5.64) | 0.4  | 10/14   | 1.92 (0.61; 6.01) | 0.3  |

<sup>a</sup>OR: odds ratio, CI: confidence interval. Adjusted for ethnic group, level of education, obesity, family history of thyroid cancer, personal history of radiotherapy, dietary iodine intake, and number of pregnancies for women.

<sup>b</sup>Reference category

**eTable 9.** Papillary Differentiated Thyroid Carcinoma Risk by Radiation Dose Received to Thyroid Before Age 15 y and Nuclear Site Work

Status

| Exposure                   | Total population, matched analysis<br>(315 cases and 438 controls) |                          |             | Excluding unifocal micro carcinomas<br>size and their controls, matched analysis<br>(198 cases / 273 controls) |                         |             | Excluding unifocal micro carcinomas,<br>unmatched analysis, stratified on study, sex and<br>age<br>(198 cases / 555 controls) |                          |         |
|----------------------------|--------------------------------------------------------------------|--------------------------|-------------|----------------------------------------------------------------------------------------------------------------|-------------------------|-------------|-------------------------------------------------------------------------------------------------------------------------------|--------------------------|---------|
|                            | Cases/<br>Controls                                                 | OR (95%CI) <sup>a</sup>  | p-<br>value | Cases/<br>Controls                                                                                             | OR (95%CI) <sup>a</sup> | p-<br>value | Cases/<br>Controls                                                                                                            | OR (95%CI) <sup>a</sup>  | p-value |
| Thyroid dose before age 15 |                                                                    |                          |             |                                                                                                                |                         |             |                                                                                                                               |                          |         |
| <1 mGy                     | 169/207                                                            | 1 <sup>b</sup>           |             | 100/133                                                                                                        | 1 <sup>b</sup>          |             | 100/272                                                                                                                       | 1 <sup>b</sup>           |         |
| 1– 9.9 mGy                 | 138/217                                                            | 0.8 (0.4; 1.4)           |             | 82/133                                                                                                         | 1.0 (0.4; 2.4)          |             | 82/266                                                                                                                        | 1.0 (0.6; 1.8)           |         |
| 10 – 19.9 mGy              | 13/10                                                              | 1.0 (0.3; 3.4)           |             | 12/5                                                                                                           | 3.1 (0.6; 16.5)         |             | 12/13                                                                                                                         | 3.0 (1.0; 9.1)           |         |
| 20 – 35 mGy                | 4/4                                                                | 1.5 (0.2; 12.6)          |             | 4/2                                                                                                            | 3.8 (0.3; 63.5)         |             | 4/4                                                                                                                           | 4.7 (0.8; 23.5)          |         |
| Linear model               |                                                                    | 0.038 (-0.084 ; 0.16)    | 0.4         |                                                                                                                | 0.21 (-0.23 ; 0.65)     | 0.02        |                                                                                                                               | 0.11 (-0.020 ; 0.30)     | 0.007   |
| Exponential model          |                                                                    | 0.058 (-0.034 ; 0.14)    | 0.3         |                                                                                                                | 0.18 (0.070 ; 0.29)     | 0.004       |                                                                                                                               | 0.094 (0.040; 0.15)      | 0.004   |
| Quadratic model            |                                                                    | 0.0032 (-0.0052 ; 0.020) | 0.3         |                                                                                                                | 0.026 (-0.016 ; 0.068)  | 0.003       |                                                                                                                               | 0.0090 (-0.0026 ; 0.026) | 0.003   |

Work at nuclear sites during tests

|     |         |                |     |         |                |     |         |                 |      |
|-----|---------|----------------|-----|---------|----------------|-----|---------|-----------------|------|
| No  | 305/430 | 1 <sup>b</sup> |     | 189/267 | 1 <sup>b</sup> |     | 189/541 | 1 <sup>b</sup>  |      |
| Yes | 10/8    | 1.4 (0.5; 4.1) | 0.4 | 9/6     | 2.0 (0.5; 8.2) | 0.3 | 9/14    | 2.9 (0.8; 10.3) | 0.09 |

---

<sup>a</sup>OR: odds ratio, CI: confidence interval. Adjusted for ethnic group, level of education, obesity, family history of thyroid cancer, personal history of radiotherapy, dietary iodine intake, and number of pregnancies for women.

<sup>b</sup>Reference category

**eTable 10.** Papillary Differentiated Thyroid Carcinoma Risk by Lifetime Thyroid Radiation Dose and Nuclear Site Work Status

| Exposure          | Total population, matched analysis<br>(315 cases and 438 controls) |                          |             | Excluding unifocal micro carcinomas size<br>and their controls, matched analysis<br>(198 cases / 273 controls) |                         |             | Excluding unifocal micro carcinomas,<br>unmatched analysis, stratified on study, sex<br>and age<br>(198 cases / 555 controls) |                          |             |
|-------------------|--------------------------------------------------------------------|--------------------------|-------------|----------------------------------------------------------------------------------------------------------------|-------------------------|-------------|-------------------------------------------------------------------------------------------------------------------------------|--------------------------|-------------|
|                   | Cases/<br>Controls                                                 | OR (95%CI) <sup>a</sup>  | p-<br>value | Cases/<br>Controls                                                                                             | OR (95%CI) <sup>a</sup> | p-<br>value | Cases/<br>Controls                                                                                                            | OR (95%CI) <sup>a</sup>  | p-<br>value |
|                   | Lifetime thyroid dose                                              |                          |             |                                                                                                                |                         |             |                                                                                                                               |                          |             |
| <1 mGy            | 87/101                                                             | 1 <sup>b</sup>           |             | 59/68                                                                                                          | 1 <sup>b</sup>          |             | 59/132                                                                                                                        | 1 <sup>b</sup>           |             |
| 1– 9.9 mGy        | 203/306                                                            | 0.89 (0.50; 1.6)         | 0.3         | 119/189                                                                                                        | 0.68 (0.30; 1.5)        | 0.07        | 119/385                                                                                                                       | 1.0 (0.59 ; 1.8)         | 0.03        |
| 10 – 19.9 mGy     | 20/27                                                              | 0.99 (0.40; 2.4)         |             | 16/14                                                                                                          | 1.5 (0.44; 4.9)         |             | 16/33                                                                                                                         | 1.9 (0.77; 4.6)          |             |
| 20 – 39 mGy       | 5/4                                                                | 1.8 (0.24; 14.4)         |             | 4/2                                                                                                            | 2.5 (0.15; 40.4)        |             | 4/5                                                                                                                           | 3.9 (0.76; 20.3)         |             |
| Linear model      |                                                                    | 0.064 (-0.057 ; 0.18)    | 0.16        |                                                                                                                | 0.22 (-0.15 ; 0.61)     | 0.008       |                                                                                                                               | 0.075 (-0.027; 0.18)     | 0.03        |
| Exponential model |                                                                    | 0.056 (-0.020 ; 0.13)    | 0.3         |                                                                                                                | 0.15 (0.063 ; 0.21      | 0.004       |                                                                                                                               | 0.071 (0.023; 0.15)      | 0.02        |
| Quadratic model   |                                                                    | 0.0021 (-0.0032; 0.0074) | 0.2         |                                                                                                                | 0.020 (-0.0073; 0.047)  | 0.003       |                                                                                                                               | 0.0039 (-0.0015; 0.0093) | 0.03        |

Work at nuclear sites during tests

|     |         |                 |         |                |                  |                |      |                  |      |
|-----|---------|-----------------|---------|----------------|------------------|----------------|------|------------------|------|
| No  | 305/430 | 1 <sup>b</sup>  | 189/267 | 1 <sup>b</sup> | 189/541          | 1 <sup>b</sup> |      |                  |      |
| Yes | 10/8    | 1.5 (0.49; 4.3) | 0.2     | 9/6            | 2.1 (0.49 ; 8.7) | 0.3            | 2/13 | 2.9 (0.84; 10.2) | 0.09 |

---

<sup>a</sup>OR: odds ratio, CI: confidence interval. Adjusted for ethnic group, level of education, obesity, family history of thyroid cancer, personal history of radiotherapy, dietary iodine intake, and number of pregnancies for women.

<sup>b</sup>Reference category

**eTable 11.** Radiation Dose Response Modifiers for Dose Received Before Age 15 y

|                        | Total population, matched analysis<br>(395 cases and 555 controls) |                             |                                       | Excluding unifocal micro carcinomas and<br>their controls, matched analysis<br>(258 cases / 359 controls) |                             |                      | Excluding unifocal micro carcinomas, unmatched<br>analysis, stratified on study, sex and age<br>(258 cases / 555 controls) |                             |                      |
|------------------------|--------------------------------------------------------------------|-----------------------------|---------------------------------------|-----------------------------------------------------------------------------------------------------------|-----------------------------|----------------------|----------------------------------------------------------------------------------------------------------------------------|-----------------------------|----------------------|
|                        | Cases/<br>Controls                                                 | OR/mGy (95%CI) <sup>a</sup> | Interaction<br>: p-value <sup>b</sup> | Cases/<br>Controls                                                                                        | OR/mGy (95%CI) <sup>a</sup> | p-value <sup>b</sup> | Cases/<br>Controls                                                                                                         | OR/mGy (95%CI) <sup>a</sup> | p-value <sup>b</sup> |
| <b>Study phase</b>     |                                                                    |                             |                                       |                                                                                                           |                             |                      |                                                                                                                            |                             |                      |
| 1                      | 229/373                                                            | 0.022 (-0.11; 0.16)         |                                       | 147/240                                                                                                   | 0.17 (-0.31; 0.65)          |                      | 147/373                                                                                                                    | 0.10 (-0.057; 0.31)         |                      |
| 2                      | 166/182                                                            | 0.12 (-0.21; 0.45)          | 0.5                                   | 111/119                                                                                                   | 0.27 (-0.65; 1.18)          | >0.5                 | 111/182                                                                                                                    | 0.046 (-0.10; 0.37)         | >0.5                 |
| <b>Birth period</b>    |                                                                    |                             |                                       |                                                                                                           |                             |                      |                                                                                                                            |                             |                      |
| Before 1963            | 176/272                                                            | 0.069 (-0.18; 0.32)         |                                       | 116/171                                                                                                   | 0.47 (-0.83; 1.79)          |                      | 116/272                                                                                                                    | 0.069 (-0.072; 0.25)        |                      |
| 1963 or after          | 219/283                                                            | 0.027 (-0.11; 0.16)         | >0.5                                  | 142/188                                                                                                   | 0.096 (-0.22; 0.42)         | 0.2                  | 142/283                                                                                                                    | 0.099 (-0.43; 0.24)         | >0.5                 |
| <b>Ethnical origin</b> |                                                                    |                             |                                       |                                                                                                           |                             |                      |                                                                                                                            |                             |                      |
| Polynesian             | 219/283                                                            | 0.073 (-0.10; 0.25)         | 0.05                                  | 142/188                                                                                                   | 0.18 (-0.18; 0.55)          | 0.02                 | 142/283                                                                                                                    | 0.12 (-0.047; 0.34)         | 0.1                  |
| Other                  | 176/272                                                            | -0.040 (-0.11; 0.25)        |                                       | 116/171                                                                                                   | -0.040 (-0.19; 0.23)        |                      | 116/272                                                                                                                    | 0.011 (-0.081; 0.10)        |                      |

|                                       |         |                       |       |         |                     |      |         |                      |      |
|---------------------------------------|---------|-----------------------|-------|---------|---------------------|------|---------|----------------------|------|
| Gender                                |         |                       |       |         |                     |      |         |                      |      |
| Female                                | 336/473 | 0.029 (-0.094; 0.15)  | > 0.5 | 210/293 | 0.093 (-0.18; 0.26) | >0.5 | 210/473 | 0.071 (-0.045; 0.23) | >0.5 |
| Male                                  | 59/82   | 0.14 (-0.43; 0.72)    |       | 48/82   | 0.25 (-0.69; 1.18)  |      | 48/82   | 0.20 (-0.29; 1.81)   |      |
| Obesity (BMI>30)                      |         |                       |       |         |                     |      |         |                      |      |
| No                                    | 186/355 | 0.0079 (-0.062; 0.11) | 0.2   | 124/226 | 0.064 (-0.16; 0.29) | 0.5  | 124/355 | 0.079 (-0.12; 0.22)  | >0.5 |
| Yes                                   | 209/200 | 0.13 (-0.19; 0.41)    |       | 134/133 | 0.17 (-0.26; 0.60)  |      | 134/200 | 0.092 (-0.067; 0.32) |      |
| Number of pregnancies<br>(Women only) |         |                       |       |         |                     |      |         |                      |      |
| < 4                                   | 145/276 | 0.12 (-0.18; 0.41)    |       | 91/173  | 0.15 (-0.33; 0.62)  |      | 91/276  | 0.086 (-0.089; 0.26) |      |
| 4 or more                             | 191/197 | 0.043 (-0.15; 0.24)   | >0.5  | 119/120 | 0.28 (-0.51; 1.08)  | 0.5  | 119/197 | 0.069 (-0.082; 0.22) | >0.5 |

---

<sup>a</sup>OR/mGy: Odds Ratio for each mGy, CI: confidence interval. Adjusted for ethnic group, level of education, body surface area, family history of thyroid cancer, personal history of radiotherapy, dietary iodine intake, and number of pregnancies for women.

<sup>b</sup>p-value for interaction.



**eFigure.** Study Flowchart

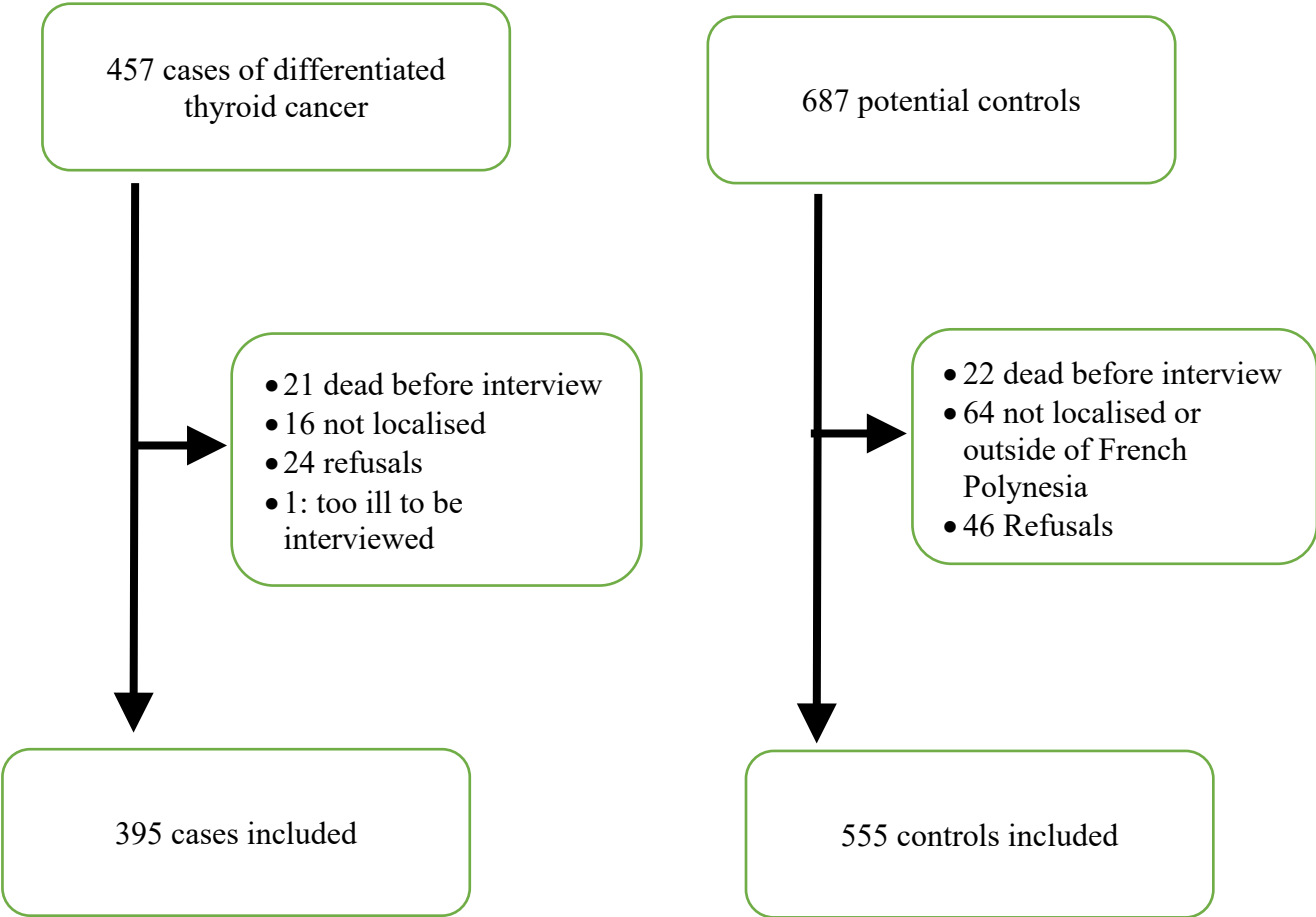

Supplement: jamanetwopen-e2311908-s001.pdf [file jamanetwopen-e2311908-s001.pdf]
