# Supplementary material for: Assessment of Differentiated Thyroid Carcinomas in French Polynesia After Atmospheric Nuclear Tests Performed by France
Source: PubMed Central journal article supplement (PMC10163383; doi:10.1001/jamanetworkopen.2023.11908), 2023-05-05
Supplement: jamanetwopen-e2311908-s002.pdf [file jamanetwopen-e2311908-s002.pdf]

## Data Sharing Statement

de Vathaire. Assessment of Differentiated Thyroid Carcinomas in French Polynesia After Atmospheric Nuclear Tests Performed by France. *JAMA Netw Open*. Published online May 5, 2023. doi:10.1001/jamanetworkopen.2023.11908

### Data

**Data available:** Yes

**Data types:** Deidentified participant data

**How to access data:** Deidentified participant data after establishment of a DTA : Florent de Vathaire [florent.devathaire@gustaveroussy.fr](mailto:florent.devathaire@gustaveroussy.fr)

**When available:** With publication

### Supporting Documents

**Document types:** Statistical/analytic code

**How to access documents:** Florent de Vathaire [florent.devathaire@gustaveroussy.fr](mailto:florent.devathaire@gustaveroussy.fr)

**When available:** With publication

### Additional Information

**Who can access the data:** [florent.devathaire@gustaveroussy.fr](mailto:florent.devathaire@gustaveroussy.fr)

**Types of analyses:** SAS programmes

**Mechanisms of data availability:** After establishment of a DTA

**Any additional restrictions:** None
